# Supplementary material for: Setting Research Priorities for Preconception Care in Low- and Middle-Income Countries: Aiming to Reduce Maternal and Child Mortality and Morbidity
Source: PLoS Med. 2013 Sep 3;10(9):e1001508. doi: 10.1371/journal.pmed.1001508 (PMC3760783; doi:10.1371/journal.pmed.1001508)
Supplement: Table S3 — Template of scoring sheet. (XLSX) [file pmed.1001508.s003.xlsx]

## Sheet: PRECONCEPTION CARE
CHNRI RESEARCH PRIORITY SETTING PRECONCEPTION CARE DEVELOPMENT & DELIVERY IN LOW-MIDDLE INCOME COUNTRIES	ANSWERABLITY			EFFECTIVENESS			DELIVERABILITY			IMPACT ON PREGNANCY OUTCOMES			IMPACT ON LONG-TERM OUTCOMES			EFFECT ON EQUITY
INSTRUCTIONS: Rollover the comment for each criterion to see the scoring question. Please score each Research question across all 6 criteria (Q.1-3 for each, answer Yes=1, No=0, Undecided=0.5, Insufficiently informed=blank). Return sheet by Aug 30th to sohni.dean@aku.edu (Mark as cc: zulfiqar.bhutta@aku.edu ; zohra.lassi@aku.edu). Contact sohni.dean@aku.edu for any clarifications.	CRITERION 1			CRITERION 2			CRITERION 3			CRITERION 4			CRITERION 5			CRITERION 5
RESEARCH QUESTIONS	Q.1	Q.2	Q.3	Q.1	Q.2	Q.3	Q.1	Q.2	Q.3	Q.1	Q.2	Q.3	Q.1	Q.2	Q.3	Q.1	Q.2	Q.3
What are the factors contributing to repeat pregnancies and short inter-conception intervals in adolescents ?
Preconception and Inter-conception Care/Counseling
What should constitute an essential package of preconception health interventions for all girls and women of reproductive age?	1	1	0	1	0.5	0.5	0.5	0.5	1	0.5	1	1	0.5	1	1	0.5	1	0.5
How can preconception care be most effectively integrated into RMNCH programs for service delivery at scale?	0.5	1	1	1	0.5	0.5	1	0.5	1	0.5	1	1	0.5	1	1	0.5	1	0.5
What alternative delivery approaches can be developed to increase coverage and affordability of preconception interventions among girls and women in different settings (ie. urban, peri-urban and rural)?	0.5	1	0.5	1	0.5	0.5	1	0.5	1	0.5	1	1	0.5	1	1	0.5	1	0.5
How can communication channels (mass media, social networking) be used to increase healthy preconception behaviors and demand for preconception services?	0.5	0.5	1	1	1	0.5	0.5	1	1	0.5	0.5	0.5	1	0.5	1	1	0.5	1
What is the effect, cost and feasibility of using cell phones and other information technologies to improve capacities of front-line workers to target and follow-up women of reproductive age for improved preconception health care?	1	1	1	1	1	0.5	1	1	1	1	0.5	1	1	1	1	1	1	1
How can cell phones and other information technologies be best utilized to improve care-seeking for preconception services and healthy behaviors, especially amongst adolescents?	1	1	1	1	1	0.5	1	1	1	1	0.5	1	1	1	1	1	1	1
How can economic incentives and performance-based payments be used to increase healthy preconception behaviors and demand for preconception services?	1	1	1	1	1	1	1	0.5	1	0.5	0.5	1	1	0.5	1	1	1	1
How can the supply chain for commodities for effective preconception services (nutrition, contraception, medications for chronic and infectious diseases) be integrated with other logistical systems so that it is more reliable and effective?	1	1	0.5	1	1	0.5	1	1	1	1	0.5	1	1	1	1	1	1	1
What are the most effective strategies to involve men in improving preconception health in community and primary healthcare settings?	1	1	0.5	1	1	0.5	1	0.5	1	0.5	1	1	0.5	1	1	0.5	1	0.5
How can effective interventions to prevent adolescent pregnancy and repeat adolescent pregnancy be delivered at scale?	1	1	1	1	1	1	1	0.5	1	0.5	0.5	1	1	0.5	1	1	1	1
How can effective interventions (that increase demand, care-seeking and access) to promote adolescent health and nutrition be delivered at scale?	1	1	1	1	1	1	1	0.5	1	0.5	0.5	1	1	0.5	1	1	1	1
What are effective strategies to increase the demand for and supply of contraceptives for women, including multiparas, during their later reproductive years?	0.5	1	1	1	0.5	0.5	1	1	1	1	0.5	1	1	1	1	1	1	1
Specific Interventions
What approaches work to increase the use of effective contraception, especially long-acting methods, particularly in the postnatal and post-abortion time periods?	1	1	1	1	1	1	1	0.5	1	0.5	0.5	1	1	0.5	1	1	1	1
What strategies could be developed to promote knowledge of and access to emergency contraception?	1	1	1	1	1	1	1	1	1	0.5	0.5	1	1	0.5	1	1	1	0.5
How can the quality of and access to comprehensive post-abortion care services, (including contraceptive counseling, provided by different cadres of healthcare workers, and adaptation to maximize uptake by adolescents) be improved?	1	1	1	1	1	1	1	0.5	1	0.5	0.5	1	1	0.5	1	1	1	1
How can preconception nutrition interventions, such as diet diversity, micronutrient supplementation/fortification and achieving optimal BMI, be integrated into broader nutrition and/or health programs and delivered in a cost-effective manner?	0.5	0.5	1	1	1	1	1	0.5	1	0.5	0.5	1	1	0.5	1	0.5	0.5	0
What are the most effective strategies to scale up the prevention/ detection/ treatment of malaria and helminthiasis to reduce anemia in women of reproductive age?	0.5	0.5	1	1	1	1	1	0.5	1	0.5	0.5	1	1	0.5	1	1	1	1
How can partnerships with other sectors including agriculture, industry, and education be developed to increase the distribution and consumption of nutritious foods and supplements?	1	0.5	0	0.5	0.5	0.5	1	0.5	1	0.5	0.5	1	1	0.5	1	0.5	0.5	0
What effective, affordable strategies could be developed to provide effective STI/HIV identification and management, including early antiretroviral therapy, as part of preconception care, and how could these be adapted to maximize uptake by adolescents?	0.5	0.5	1	1	0.5	0.5	1	0.5	1	0.5	0.5	1	1	0.5	1	1	0.5	0.5
Develop and evaluate the effect and cost of different delivery strategies for an immunization package for girls including rubella and tetanus, and others as appropriate	0.5	0.5	1	1	1	1	1	0.5	1	0.5	0.5	1	1	0.5	1	1	0.5	0.5
How can task-shifting to community health workers to screen for chronic conditions among women during the preconception period and take appropriate action (such as referring to specialist, counselling, refer to support groups) be effectively enabled?	1	0.5	0.5	1	1	1	1	0.5	0.5	0.5	0.5	1	1	0.5	1	1	1	1
What are effective, affordable and feasible means to screen for diabetes affecting girls and women before conception?	1	1	1	1	1	1	1	0.5	0.5	1	1	1	1	0.5	1	1	1	1
What are effective, affordable and feasible means to screen for hypertension affecting girls and women before conception?	1	0.5	0.5	1	1	1	1	0.5	0.5	1	0.5	1	1	0.5	1	1	1	1
What are effective, affordable and feasible means to screen for cardiac disease affecting girls and women before conception?	1	0.5	0.5	1	1	1	1	0.5	0.5	0.5	0.5	1	1	0.5	1	1	0.5	0.5
How can a package of promotive and preventive mental health interventions for women and girls be effectively and feasibly provided through community health workers and/or groups, with linkages to the primary healthcare system for treatment?	1	1	1	1	1	1	1	0.5	0.5	0.5	0.5	1	1	0.5	1	1	1	1
What effective strategies could be developed to prevent and respond to coerced sex and intimate partner violence in women and girls?	0.5	0.5	0.5	1	1	1	1	0.5	0.5	0	0	0	1	0.5	1	1	1	1
What are the best approaches for ensuring that women avoid tobacco use in the preconception period?	1	0.5	0.5	1	1	1	1	0.5	0.5	1	1	0.5	1	0.5	1	0.5	0.5	0.5
What are the most effective approaches for ensuring that women do not consume harmful levels of alcohol (especially binge and heavy drinking) during the preconception period?	1	0.5	0.5	1	1	1	1	0.5	0.5	1	1	0.5	1	0.5	1	1	0.5	0.5
What is the effect, cost and feasibility of a package for community-based genetic screening, that includes screening using a complete medical history, basic laboratory investigations, minimum laboratory requirements, counseling and post-screening services (for hemoglobinopathies, or similar genetic diseases)?	1	0.5	0	1	0.5	0.5	0.5	0.5	0.5	0.5	0.5	1	0.5	1	1	1	0.5	0.5
What is the feasibility of addressing the risks for consanguinity in a culturally-appropriate manner?	1	0.5	0	1	0.5	0.5	0.5	0.5	0.5	0	0.5	1	0	1	1	1	1	1
What are the principal ethical concerns for implementing genetic screening and bio-banking in the community settings, and what approaches could be developed to address them?	1	0.5	0	1	0.5	0.5	1	0.5	0.5	0	0.5	1	0	1	1	1	1	1
What are the public health approaches to regulate and reduce environmental exposures to smoke stoves?	1	0.5	0.5	1	1	1	1	0.5	0.5	1	1	0.5	1	0.5	1	1	1	1
What are the public health approaches to regulate and reduce exposures to environmental tobacco smoke?	1	1	0.5	1	1	1	1	1	1	1	1	1	1	0.5	1	1	1	1
What are the public health approaches to regulate and reduce environmental exposures to lead?	1	1	1	1	1	1	1	1	1	1	1	1	1	0.5	1	1	1	1
What effective strategies can be developed to modify individuals' behavior to reduce their environmental exposures to smoke stoves?	1	0.5	0.5	1	1	1	1	0.5	0.5	1	1	0.5	1	0.5	1	1	1	1
What effective strategies can be developed to modify individuals' behavior to reduce their exposures to environmental tobacco smoke?	1	0.5	0.5	1	1	1	1	0.5	0.5	1	1	0.5	1	0.5	1	1	1	1
What effective strategies can be developed to modify individuals' behavior to reduce their environmental exposures to lead?	1	0.5	0.5	1	1	1	1	0.5	0.5	1	1	1	0.5	0.5	1	1	1	1

## Sheet: PRECONCEPTION CARE (2)
CHNRI RESEARCH PRIORITY SETTING PRECONCEPTION CARE DEVELOPMENT & DELIVERY IN LOW-MIDDLE INCOME COUNTRIES	ANSWERABLITY			EFFECTIVENESS			DELIVERABILITY			IMPACT ON PREGNANCY OUTCOMES			IMPACT ON LONG-TERM OUTCOMES			EFFECT ON EQUITY
INSTRUCTIONS: Rollover the comment for each criterion to see the scoring question. Please score each Research question across all 6 criteria (Q.1-3 for each, answer Yes=1, No=0, Undecided=0.5, Insufficiently informed=blank). Return sheet by Aug 30th to sohni.dean@aku.edu (Mark as cc: zulfiqar.bhutta@aku.edu ; zohra.lassi@aku.edu). Contact sohni.dean@aku.edu for any clarifications.	CRITERION 1			CRITERION 2			CRITERION 3			CRITERION 4			CRITERION 5			CRITERION 6
RESEARCH QUESTIONS	Q.1	Q.2	Q.3	Q.1	Q.2	Q.3	Q.1	Q.2	Q.3	Q.1	Q.2	Q.3	Q.1	Q.2	Q.3	Q.1	Q.2	Q.3
What are the factors contributing to repeat pregnancies and short inter-conception intervals in adolescents ?
Preconception and Inter-conception Care/Counseling
What should constitute an essential package of preconception health interventions for all girls and women of reproductive age?
How can preconception care be most effectively integrated into RMNCH programs for service delivery at scale?
What alternative delivery approaches can be developed to increase coverage and affordability of preconception interventions among girls and women in different settings (ie. urban, peri-urban and rural)?
How can communication channels (mass media, social networking) be used to increase healthy preconception behaviors and demand for preconception services?
What is the effect, cost and feasibility of using cell phones and other information technologies to improve capacities of front-line workers to target and follow-up women of reproductive age for improved preconception health care?
How can cell phones and other information technologies be best utilized to improve care-seeking for preconception services and healthy behaviors, especially amongst adolescents?
How can economic incentives and performance-based payments be used to increase healthy preconception behaviors and demand for preconception services?
How can the supply chain for commodities for effective preconception services (nutrition, contraception, medications for chronic and infectious diseases) be integrated with other logistical systems so that it is more reliable and effective?
What are the most effective strategies to involve men in improving preconception health in community and primary healthcare settings?
How can effective interventions to prevent adolescent pregnancy and repeat adolescent pregnancy be delivered at scale?
How can effective interventions (that increase demand, care-seeking and access) to promote adolescent health and nutrition be delivered at scale?
What are effective strategies to increase the demand for and supply of contraceptives for women, including multiparas, during their later reproductive years?
What approaches work to increase the use of effective contraception, especially long-acting methods, particularly in the postnatal and post-abortion time periods?
What strategies could be developed to promote knowledge of and access to emergency contraception?
How can the quality of and access to comprehensive post-abortion care services, (including contraceptive counseling, provided by different cadres of healthcare workers, and adaptation to maximize uptake by adolescents) be improved?
How can preconception nutrition interventions, such as diet diversity, micronutrient supplementation/fortification and achieving optimal BMI, be integrated into broader nutrition and/or health programs and delivered in a cost-effective manner?
What are the most effective strategies to scale up the prevention/ detection/ treatment of malaria and helminthiasis to reduce anemia in women of reproductive age?
How can partnerships with other sectors including agriculture, industry, and education be developed to increase the distribution and consumption of nutritious foods and supplements?
What effective, affordable strategies could be developed to provide effective STI/HIV identification and management, including early antiretroviral therapy, as part of preconception care, and how could these be adapted to maximize uptake by adolescents?
Develop and evaluate the effect and cost of different delivery strategies for an immunization package for girls including rubella and tetanus, and others as appropriate
How can task-shifting to community health workers to screen for chronic conditions among women during the preconception period and take appropriate action (such as referring to specialist, counselling, refer to support groups) be effectively enabled?
What are effective, affordable and feasible means to screen for diabetes affecting girls and women before conception?
What are effective, affordable and feasible means to screen for hypertension affecting girls and women before conception?
What are effective, affordable and feasible means to screen for cardiac disease affecting girls and women before conception?
How can a package of promotive and preventive mental health interventions for women and girls be effectively and feasibly provided through community health workers and/or groups, with linkages to the primary healthcare system for treatment?
What effective strategies could be developed to prevent and respond to coerced sex and intimate partner violence in women and girls?
What are the best approaches for ensuring that women avoid tobacco use in the preconception period?
What are the most effective approaches for ensuring that women do not consume harmful levels of alcohol (especially binge and heavy drinking) during the preconception period?
What is the effect, cost and feasibility of a package for community-based genetic screening, that includes screening using a complete medical history, basic laboratory investigations, minimum laboratory requirements, counseling and post-screening services (for hemoglobinopathies, or similar genetic diseases)?
What is the feasibility of addressing the risks for consanguinity in a culturally-appropriate manner?
What are the principal ethical concerns for implementing genetic screening and bio-banking in the community settings, and what approaches could be developed to address them?
What are the public health approaches to regulate and reduce environmental exposures to smoke stoves?
What are the public health approaches to regulate and reduce exposures to environmental tobacco smoke?
What are the public health approaches to regulate and reduce environmental exposures to lead?
What effective strategies can be developed to modify individuals' behavior to reduce their environmental exposures to smoke stoves?
What effective strategies can be developed to modify individuals' behavior to reduce their exposures to environmental tobacco smoke?
What effective strategies can be developed to modify individuals' behavior to reduce their environmental exposures to lead?
